# Supplementary material for: A 3D-printed hierarchical porous architecture of MOF@clay composite for rapid and highly efficient dye scavenging
Source: Royal Society of Chemistry journal article supplement (doi:10.1039/d2nj05188e), 2022-01-01
Supplement: d2nj05188e1.pdf [file d2nj05188e1.pdf]

## Supporting information

# A 3D-printed hierarchical porous architecture of MOF@clay composite for rapid and highly efficient dye scavenging

*Hossein Shahriyari Far<sup>1</sup>, Mina Najafi<sup>1</sup>, Mahdi Hasanzadeh<sup>\*2</sup>, Rahmatollah Rahimi<sup>\*1</sup>*

<sup>1</sup>Department of Chemistry, Iran University of Science and Technology, P.O. Box, Narmak 16846-13114, Tehran, Iran.

<sup>2</sup>Department of Textile Engineering, Yazd University, P.O. Box, 89195-741 Yazd, Iran.

*\*Corresponding authors:*

*Mahdi Hasanzadeh, E-mail: [m.hasanzadeh@yazd.ac.ir](mailto:m.hasanzadeh@yazd.ac.ir); Tel: +98-353-1232569; Fax: +98-353-8209817;*

*Rahmatollah Rahimi, E-mail: [Rahimi\\_Rah@iust.ac.ir](mailto:Rahimi_Rah@iust.ac.ir);*

## **Table of content:**

**Figure S1.** The EDS spectra and the Cr elemental mapping image of the MOF@Clay composite.

**Figure S2.** The elemental mapping image of the 3D-MOF@Clay architecture.

**Figure S3.** TGA curve of the MOF@Clay composite.

**Figure S4.** Zeta-potential of 3D-MOF@Clay architecture.

**Figure S5.** The chemical structure and molecular size of MO and DR31 dyes.

**Figure S6.** Comparison of dye removal efficiency of 3D-CS and 3D-MOF@Clay architectures toward (a) MO and (b) DR31 dyes.

**Figure S7.** The plots of non-linear Langmuir, Freundlich, Temkin, and Dubbin-Radushkevich isotherm models for adsorption of (a) DR31 and (b) MO dyes on the 3D-MOF@Clay architecture (pH = 4, 3D-MOF@Clay = 2.4 g, contact time = 60 min).

**Figure S8.** The plots of (a,b) non-linear PFO and PSO models, and (c,d) intraparticle diffusion model for adsorption of (a,c) DR31 and (b,d) MO dyes on the 3D-MOF@Clay architecture (pH = 4, dye concentration= 60 ppm, 3D-MOF@Clay = 2.4 g).



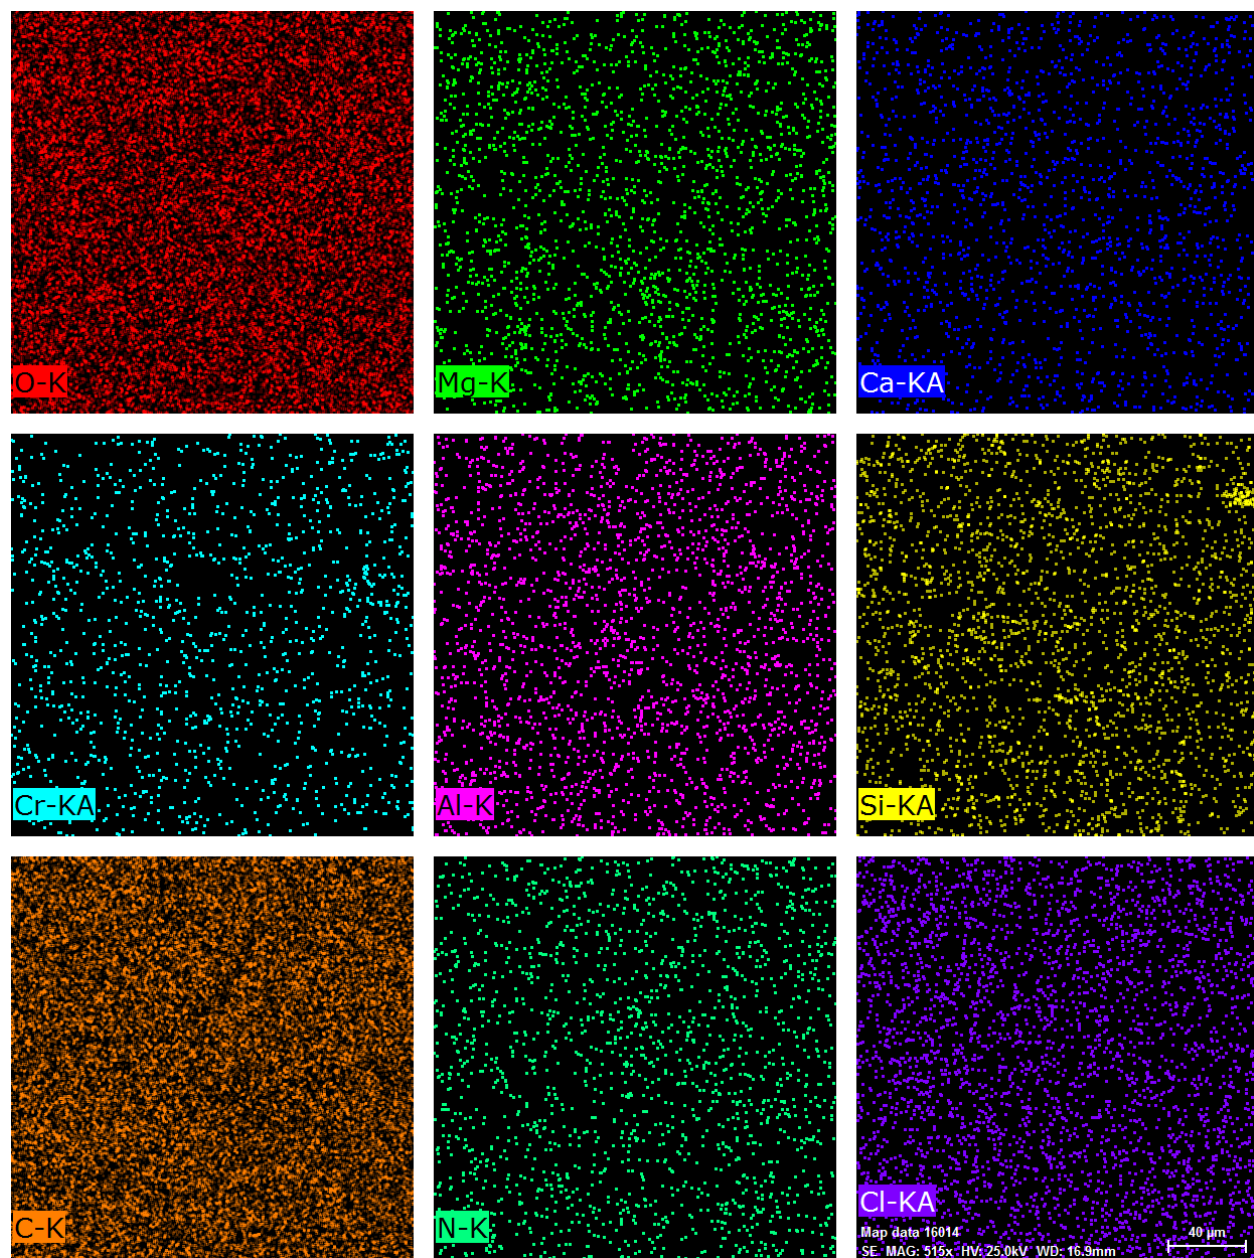

**Figure S2.** The elemental mapping image of the 3D-MOF@Clay architecture.

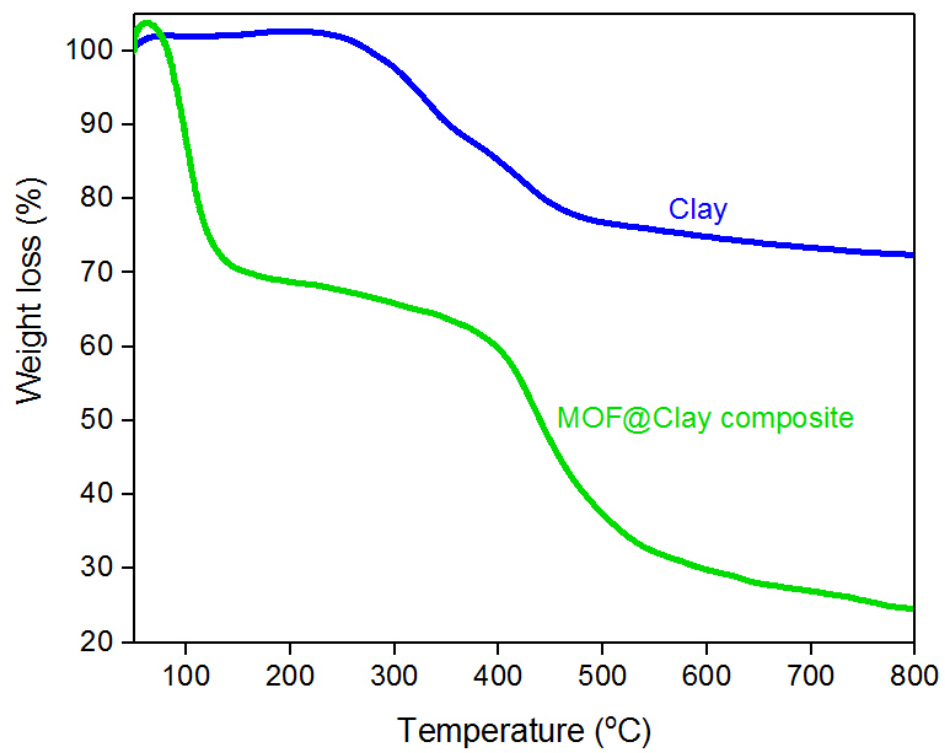

**Figure S3.** TGA curve of the MOF@Clay composite.

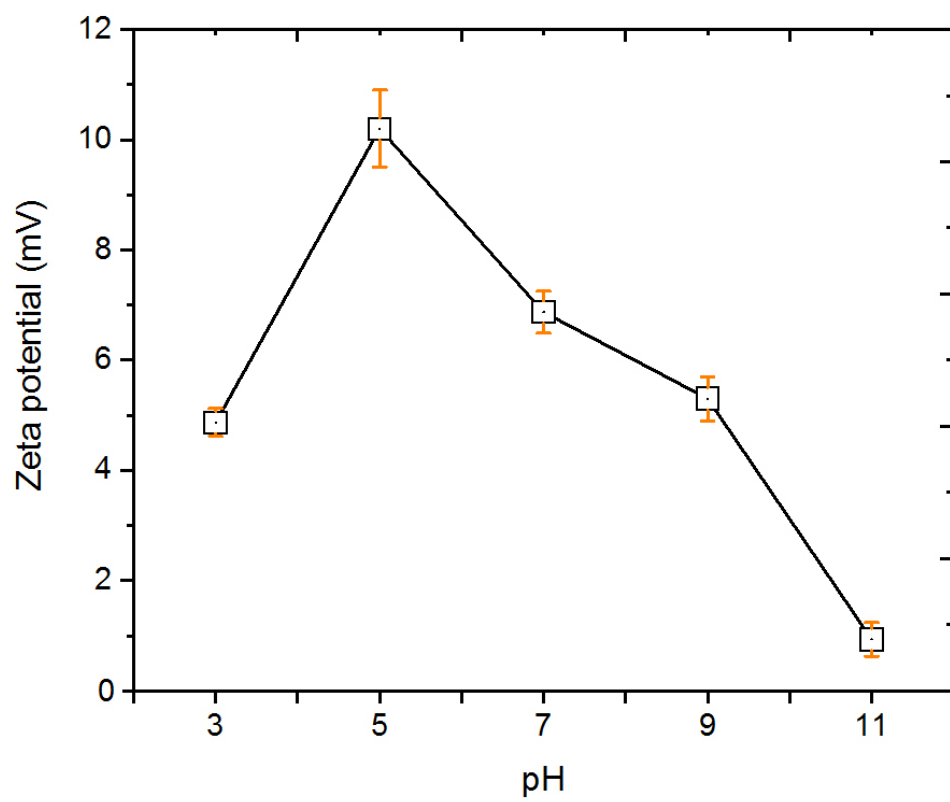

**Figure S4.** Zeta-potential of 3D-MOF@Clay architecture.

Direct Red 31 (DR31)

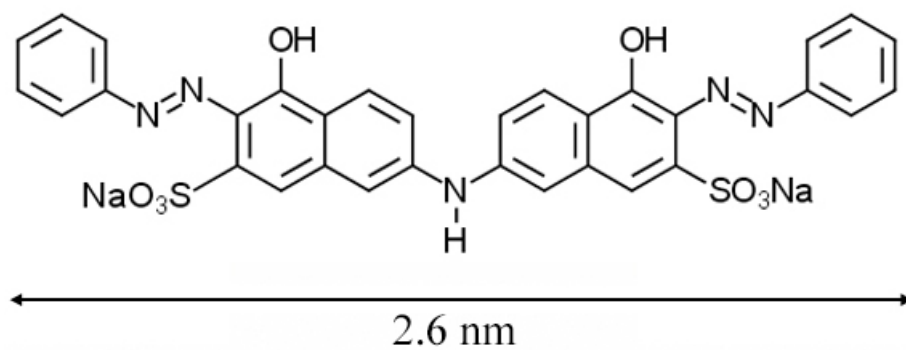

Methyl Orange (MO)

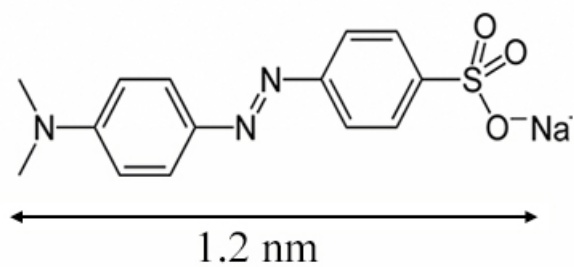

**Figure S5.** The chemical structure and molecular size of MO and DR31 dyes.

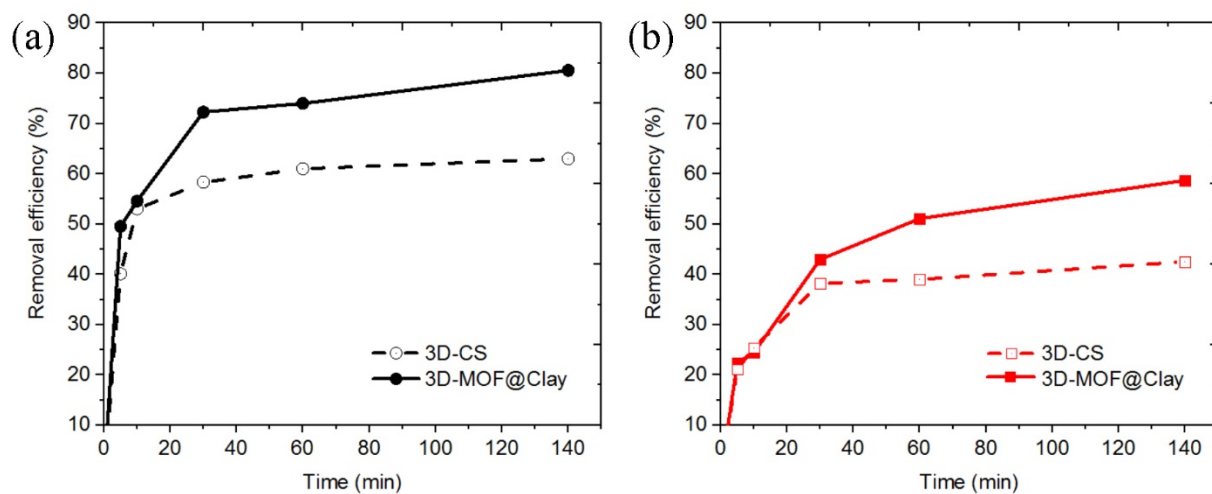

**Figure S6.** Comparison of dye removal efficiency of 3D-CS and 3D-MOF@Clay architectures toward (a) MO and (b) DR31 dyes.

### ES1: Adsorption isotherm

Adsorption isotherms were obtained through the fitting of experimental data with Langmuir, Freundlich, Temkin, and Dubinin-Radushkevich (DRK) isotherm models. The non-linear form of isotherm models are expressed by the following equations [1, 2]:

$$q_e = \frac{q_{\max} K_L C_e}{1 + K_L C_e} \quad (5)$$

$$q_e = k_F C_e^{\frac{1}{n}} \quad (6)$$

$$q_e = B \ln(K_T C_e) \quad (7)$$

$$q_e = (q_{\max}) \exp(-\beta \varepsilon^2) \quad (8)$$

where  $C_e$  (mg/L) is the dye concentration at equilibrium.  $K_L$  (L/mg) and  $K_F$  ((mg/g)(L/mg)<sup>1/n<sub>F</sub></sup>) are the Langmuir and Freundlich constants, respectively.  $1/n$  is related to the adsorption intensity [3, 4].  $B$  (J/mol) and  $K_T$  (L/mg) are the Temkin constants.  $\beta$  (mol<sup>2</sup>/kJ<sup>2</sup>) and  $\varepsilon$  (kJ/mol) are also the adsorption energy and adsorption potential constants, respectively [5]

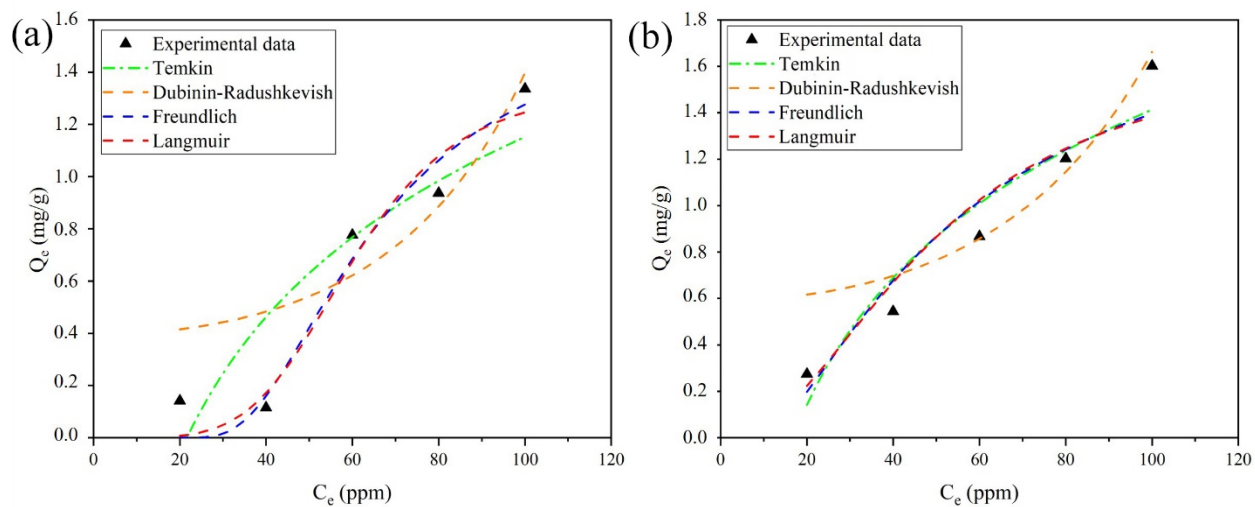

**Figure S7.** The plots of non-linear Langmuir, Freundlich, Temkin, and Dubinin-Radushkevich isotherm models for adsorption of (a) DR31 and (b) MO dyes on the 3D-MOF@Clay architecture (pH = 4, 3D-MOF@Clay = 2.4 g, contact time = 60 min).

## ES2: Adsorption kinetics

The kinetics of dye adsorption on 3D-MOF@Clay architecture were evaluated by non-linear pseudo-first-order, non-linear pseudo-second-order, and intraparticle diffusion models based on the following equations [6, 7]:

$$q_t = q_e (1 - e^{-k_1 t}) \quad (2)$$

$$q_t = \frac{k_2 q_e^2 t}{1 + k_2 q_e t} \quad (3)$$

$$q_t = K_p t^{0.5} + I \quad (4)$$

where  $q_t$  and  $q_e$  are adsorption capacity at the time  $t$  and equilibrium, respectively.  $k_1$  (1/min), and  $k_2$  (g/mg.min) are also the rate constant of pseudo-first-order and pseudo-second-order models, respectively.  $K_p$  (mg/g.min<sup>0.5</sup>) and  $I$  are the rate constant of the IPD model and the thickness of the boundary layer, respectively.

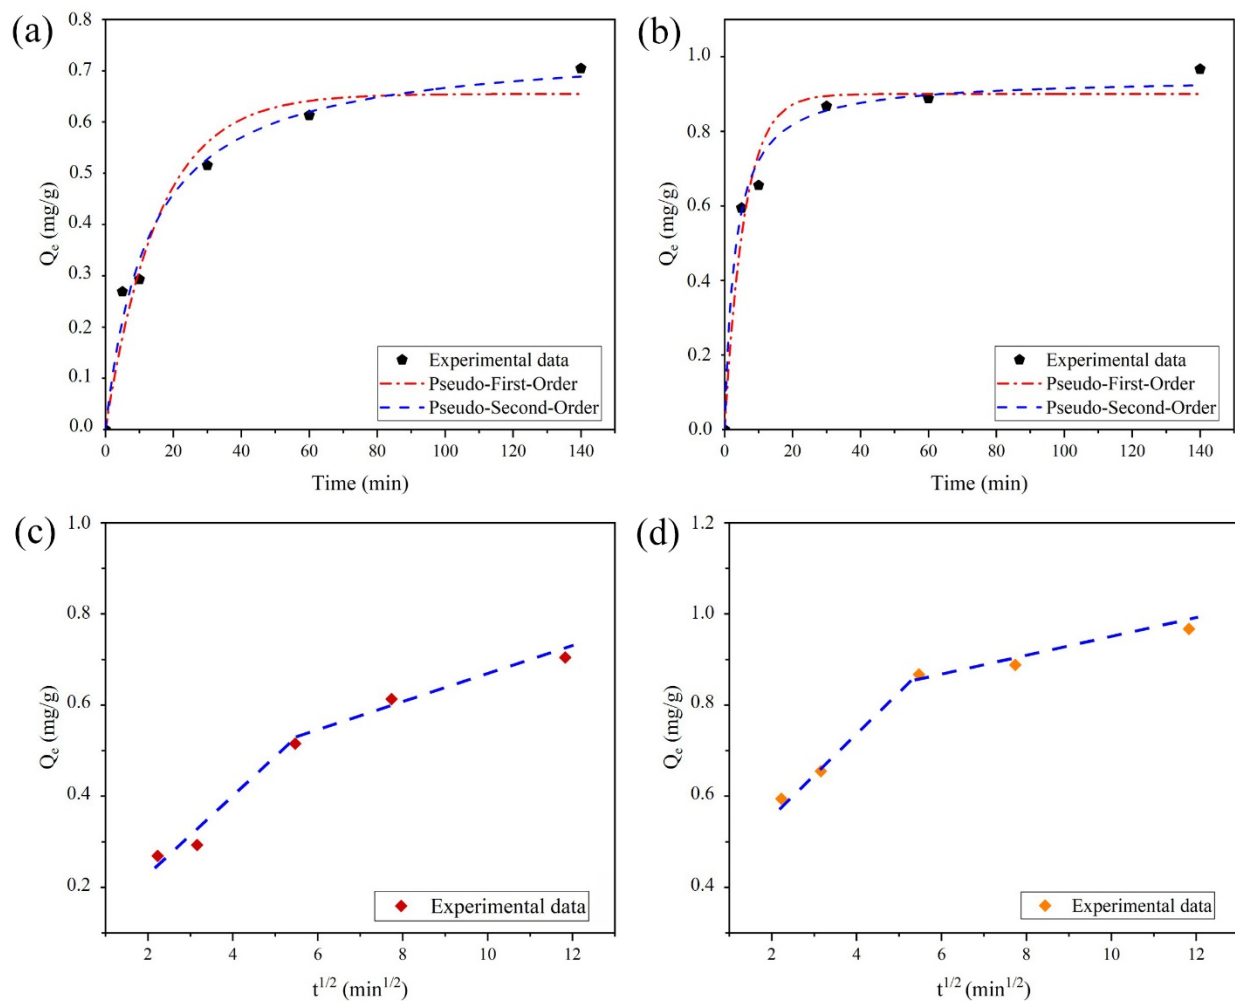

**Figure S8.** The plots of (a,b) non-linear PFO and PSO models, and (c,d) intraparticle diffusion model for adsorption of (a,c) DR31 and (b,d) MO dyes on the 3D-MOF@Clay architecture (pH = 4, dye concentration= 60 ppm, 3D-MOF@Clay = 2.4 g).

## References:

1. Raeiszadeh M, Hakimian A, Shojaei A, Molavi H (2018) Nanodiamond-filled chitosan as an efficient adsorbent for anionic dye removal from aqueous solutions. *J Environ Chem Eng* 6:3283–3294
2. Bayazit ŞS, Yildiz M, Aşçi YS, Şahin M, Bener M, Eğlence S, Abdel Salam M (2017) Rapid adsorptive removal of naphthalene from water using graphene nanoplatelet/MIL-101 (Cr) nanocomposite. *J Alloys Compd.* <https://doi.org/10.1016/j.jallcom.2017.01.111>
3. Heydari Moghaddam M, Nabizadeh R, Dehghani MH, Akbarpour B, Azari A, Yousefi M (2019) Performance investigation of Zeolitic Imidazolate Framework – 8 (ZIF-8) in the removal of trichloroethylene from aqueous solutions. *Microchem J* 150:104185
4. Baziar M, Zakeri HR, Ghalehaskar S, Nejad ZD, Shams M, Anastopoulos I, Giannakoudakis DA, Lima EC (2021) Metal-organic and Zeolitic imidazole frameworks as cationic dye adsorbents: physicochemical optimizations by parametric modeling and kinetic studies. *J Mol Liq* 332:115832
5. Hu Q, Zhang Z (2019) Application of Dubinin–Radushkevich isotherm model at the solid/solution interface: A theoretical analysis. *J Mol Liq* 277:646–648
6. Saucier C, Karthickeyan P, Ranjithkumar V, Lima EC, dos Reis GS, de Brum IAS (2017) Efficient removal of amoxicillin and paracetamol from aqueous solutions using magnetic activated carbon. *Environ Sci Pollut Res* 24:5918–5932
7. Lin J, Wang L (2009) Comparison between linear and non-linear forms of pseudo-first-order and pseudo-second-order adsorption kinetic models for the removal of methylene blue by

activated carbon. *Front Environ Sci Eng China* 3:320–324
